# Supplementary material
Source: Springer Nature journal article supplement (https://www.springermedizin.de/resource/supplementary/40478_2013_15_MOESM2_ESM.pdf/25657964)

**(a)**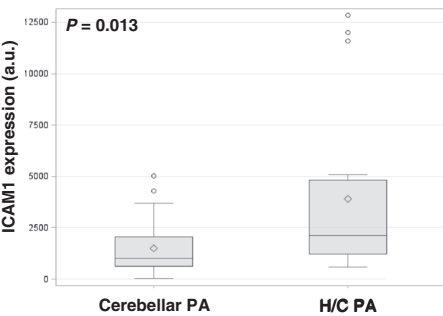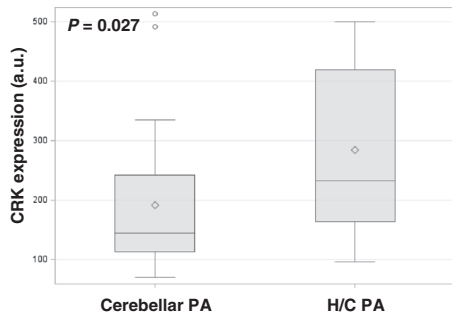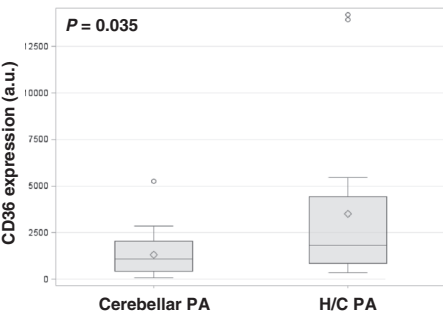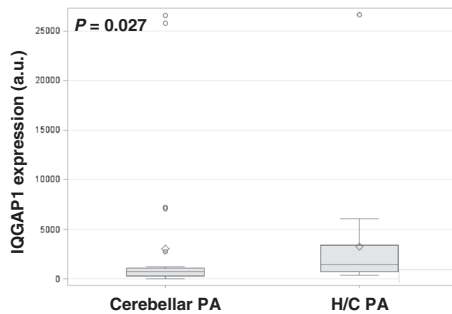**(b)**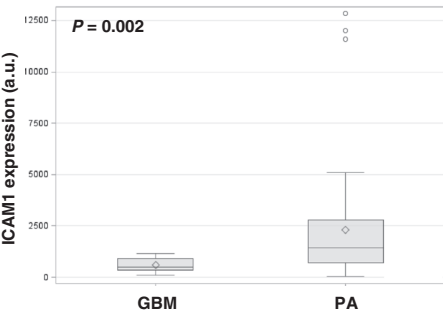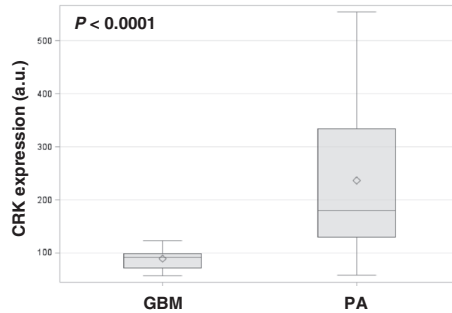

Supplement: MOESM2 [file 25657964]
